# Supplementary material for: Electrochemical reaction and surface chemistry for performance enhancement of a Si composite anode using a bis(fluorosulfonyl)imide-based ionic liquid
Source: Royal Society of Chemistry journal article supplement (doi:10.1039/c6ta06447g), 2016-01-01
Supplement: c6ta06447g1.pdf [file c6ta06447g1.pdf]

## Supplementary Information

### Investigating Electrochemical Reaction and Surface Chemistry for Performance Enhancement of Si Composite Anode Using bis(fluorosulfonyl)imide Based Ionic Liquid

Hitoshi Shobukawa,<sup>a,b</sup> JaeWook Shin,<sup>a</sup> Judith Alvarado,<sup>a</sup> Cyrus S. Rustomji,<sup>a</sup> Ying Shirley Meng<sup>a,\*</sup>

<sup>a</sup> Department of NanoEngineering, University of California, San Diego, 9500 Gilman Drive, La Jolla, CA 92093, USA

<sup>b</sup> Corporate Research & Development Center, Asahi Kasei, 1-105 Kanda Jinbocho, Chiyoda-ku, Tokyo 101-8101 Japan

\*Corresponding author: [shirleymeng@ucsd.edu](mailto:shirleymeng@ucsd.edu)

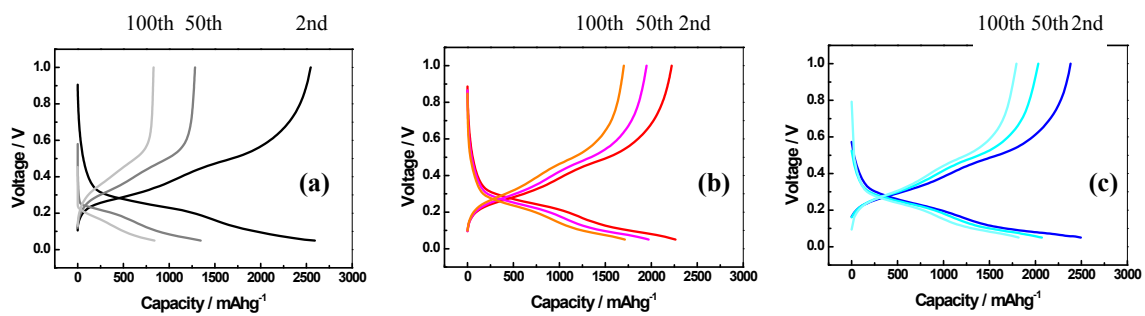

Fig. 1S Charge/discharge profile of Si anode at 2nd, 50th and 100th cycle with (a) LiPF<sub>6</sub>/EC/DEC, (b) LiPF<sub>6</sub>/EC/DEC/FEC and (c) LiFSI/EMIFSI

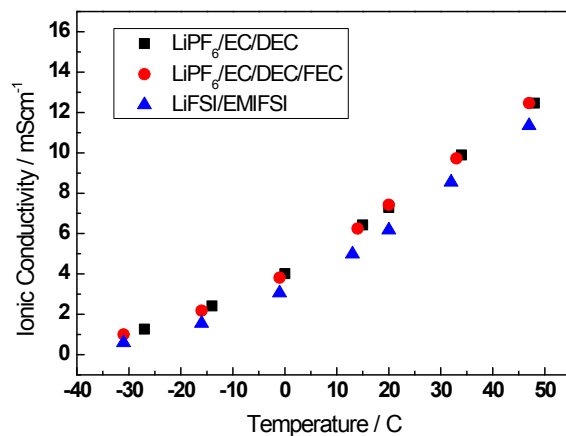

Fig. 2S Ionic conductivity measurement of the electrolytes in LiPF<sub>6</sub>/EC/DEC, LiPF<sub>6</sub>/EC/DEC/FEC and LiFSI/EMIFSI

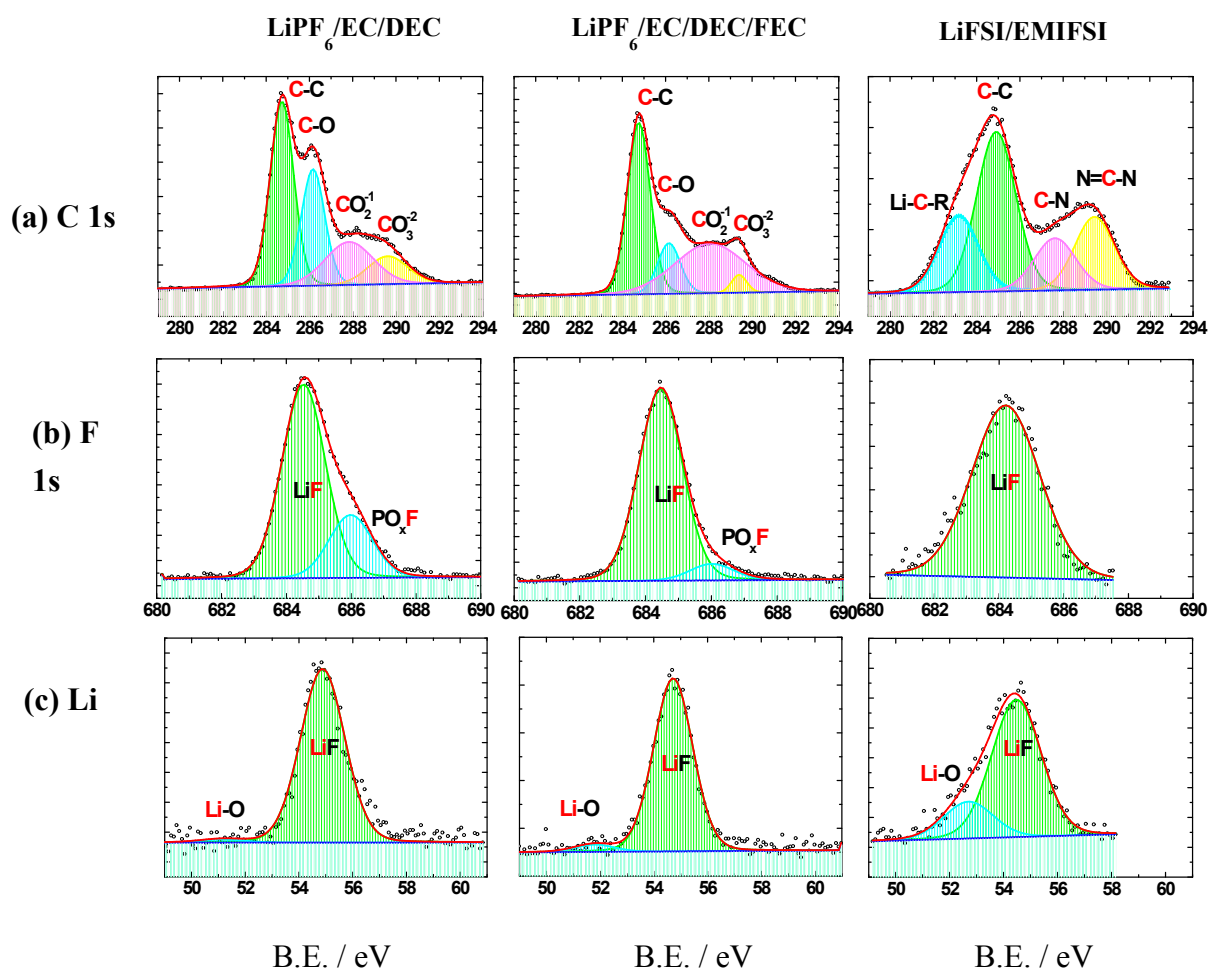

Fig. 3S (a) C 1s spectra, (b) F 1s and (c) Li 1s spectra of the Si composite anode after 100 cycles with LiPF<sub>6</sub>/EC/DEC, LiPF<sub>6</sub>/EC/DEC/FEC and LiFSI/EMIFSI respectively.
